# Supplementary material for: Microwave-assisted extraction of Camellia oleifera shell lignin via dual- acidic deep eutectic solvent and its mechanism
Source: Research Square preprint supplement (doi:10.21203/rs.3.rs-4933806/v1), 2024-10-07
Supplement: Supplementary file 1 [file 78b5c88ee71b77765961b669.docx]

Supplementary

**Microwave-assisted extraction of *Camellia oleifera* shell lignin via dual-acidic deep eutectic solvent and its mechanism**

Liu He, a, b Conghao Ku, a, b Huiqin Guo, * a, b Yangyang Peng, a, b Yue Chen, a, b Liushui Yan * a, b

a Key Laboratory of Jiangxi Province for Persistent Pollutants Control and Resources Recycle, Nanchang Hangkong University, Nanchang 330063, China.

b Jiangxi Provincial Experimental Teaching Demonstration Center of Environmental Science and Engineering, Nanchang Hangkong University, Nanchang 330063, China.

**Contents**

[**1.** **Preparation and recovery of DES** 2](#_Toc160139382)

[**2.** **DES recycling** 5](#_Toc160139383)

[**3.** **characterization of *Camellia oleifera* shell lignin** 7](#_Toc160139384)

[**4.** **Characterization of ZnCl2-LA/GG system** 11](#_Toc160139385)

[**5.** **DFT Calculation** 13](#_Toc160139386)

[**6.** **Analysis of solid residues and water-soluble products** 16](#_Toc160139387)

1. **Preparation and recovery of DES**

Table S1 DADESs with molar ratios of HBAs and HBDs.

| Hydrogen bond  acceptor (HBA) | Hydrogen bond  donor (HBD) | Respective molar ratio  (HBA:HBD) |
| --- | --- | --- |
| ZnCl2 | LA | 1:2 |
| ZnCl2 | LA | 1:4 |
| ZnCl2 | LA | 1:6 |
| ZnCl2 | LA | 1:8 |
| ZnCl2 | LA | 1:10 |
| MgCl2 | LA | 1:8 |
| CuCl2 | LA | 1:8 |
| AlCl3 | LA | 1:8 |
| FeCl3 | LA | 1:8 |
| ZnCl2 | FA | 1:8 |
| ZnCl2 | AA | 1:8 |
| ZnCl2 | PA | 1:8 |

Table S2 DES pretreatment conditions and lignin extraction rates

| DES | Molar ratio | DES pretreatment condition | | | Extraction rate(%) |
| --- | --- | --- | --- | --- | --- |
| Microwave power(W) | Reaction time(min) | Solid-liquid ratio |
| ZnCl2-LA | 1:4 | 70 | 10 | 1:20 | 19.9 |
| 1:6 | 25.8 |
| 1:8 | 97.1 |
| 1:10 | 86.2 |
| 1:12 | 82.6 |
| ZnCl2-LA | 1:8 | 30 | 8 | 1:20 | 47.7 |
| 50 | 61.9 |
| 70 | 78.5 |
| 90 | 71.5 |
| 110 | 69.5 |
| ZnCl2-LA | 1:8 | 70 | 4 | 1:20 | 50.9 |
| 6 | 73.9 |
| 8 | 84.7 |
| 10 | 96.9 |
| 12 | 80.7 |
| ZnCl2-LA | 1:8 | 70 | 10 | 1:10 | 83.2 |
| 1:15 | 89.0 |
| 1:20 | 96.0 |
| 1:25 | 87.3 |
| MgCl2-LA | 1:8 | 70 | 10 | 1:20 | 70.6 |
| CuCl2-LA | 10.6 |
| AlCl3-LA | 42.4 |
| FeCl3-LA | 7.9 |
| ZnCl2-FA | 50.2 |
| ZnCl2-AA | 60.0 |
| ZnCl2-PA | 46.9 |


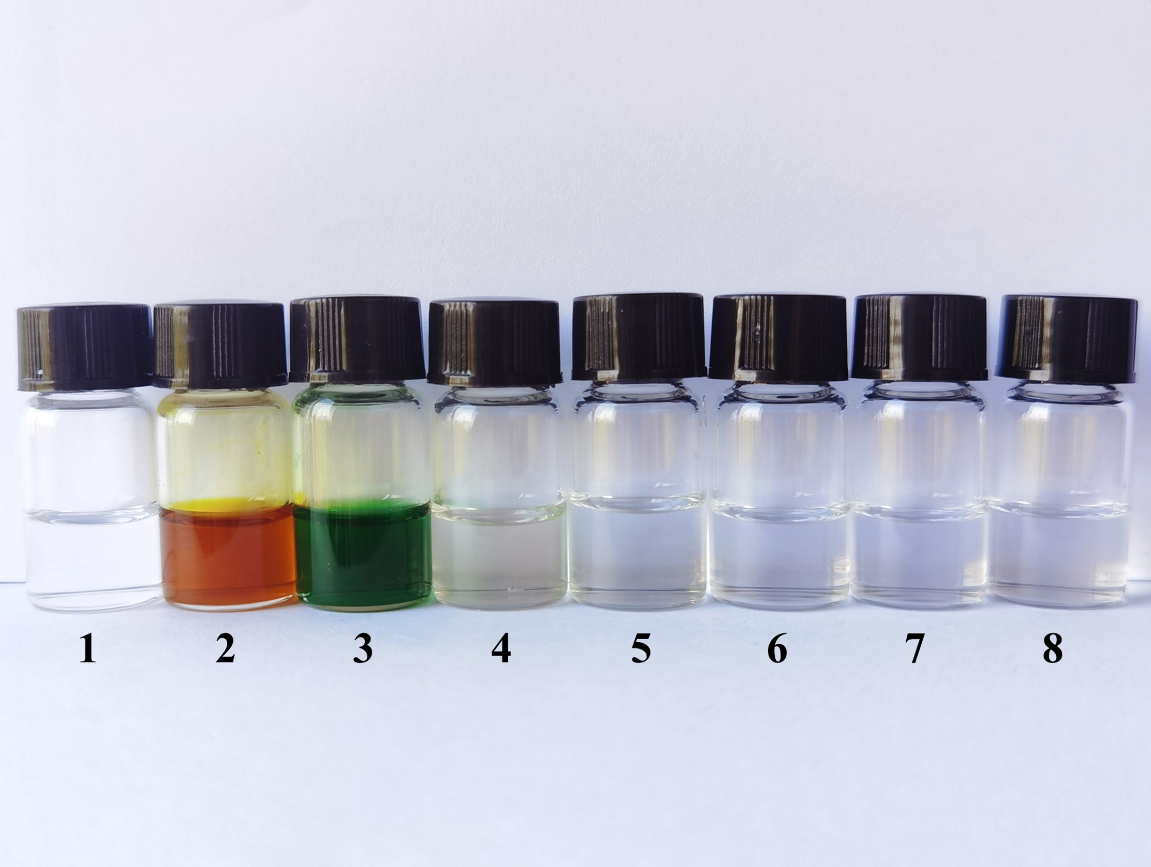
 Fig. S1 Different types of DADES. 1: MgCl2-LA; 2: FeCl3-LA; 3: CuCl2-LA; 4: AlCl3-LA; 5: ZnCl2-LA; 6: ZnCl2-FA; 7: ZnCl2-AA; 8: ZnCl2-PA.

**2. DES recycling**


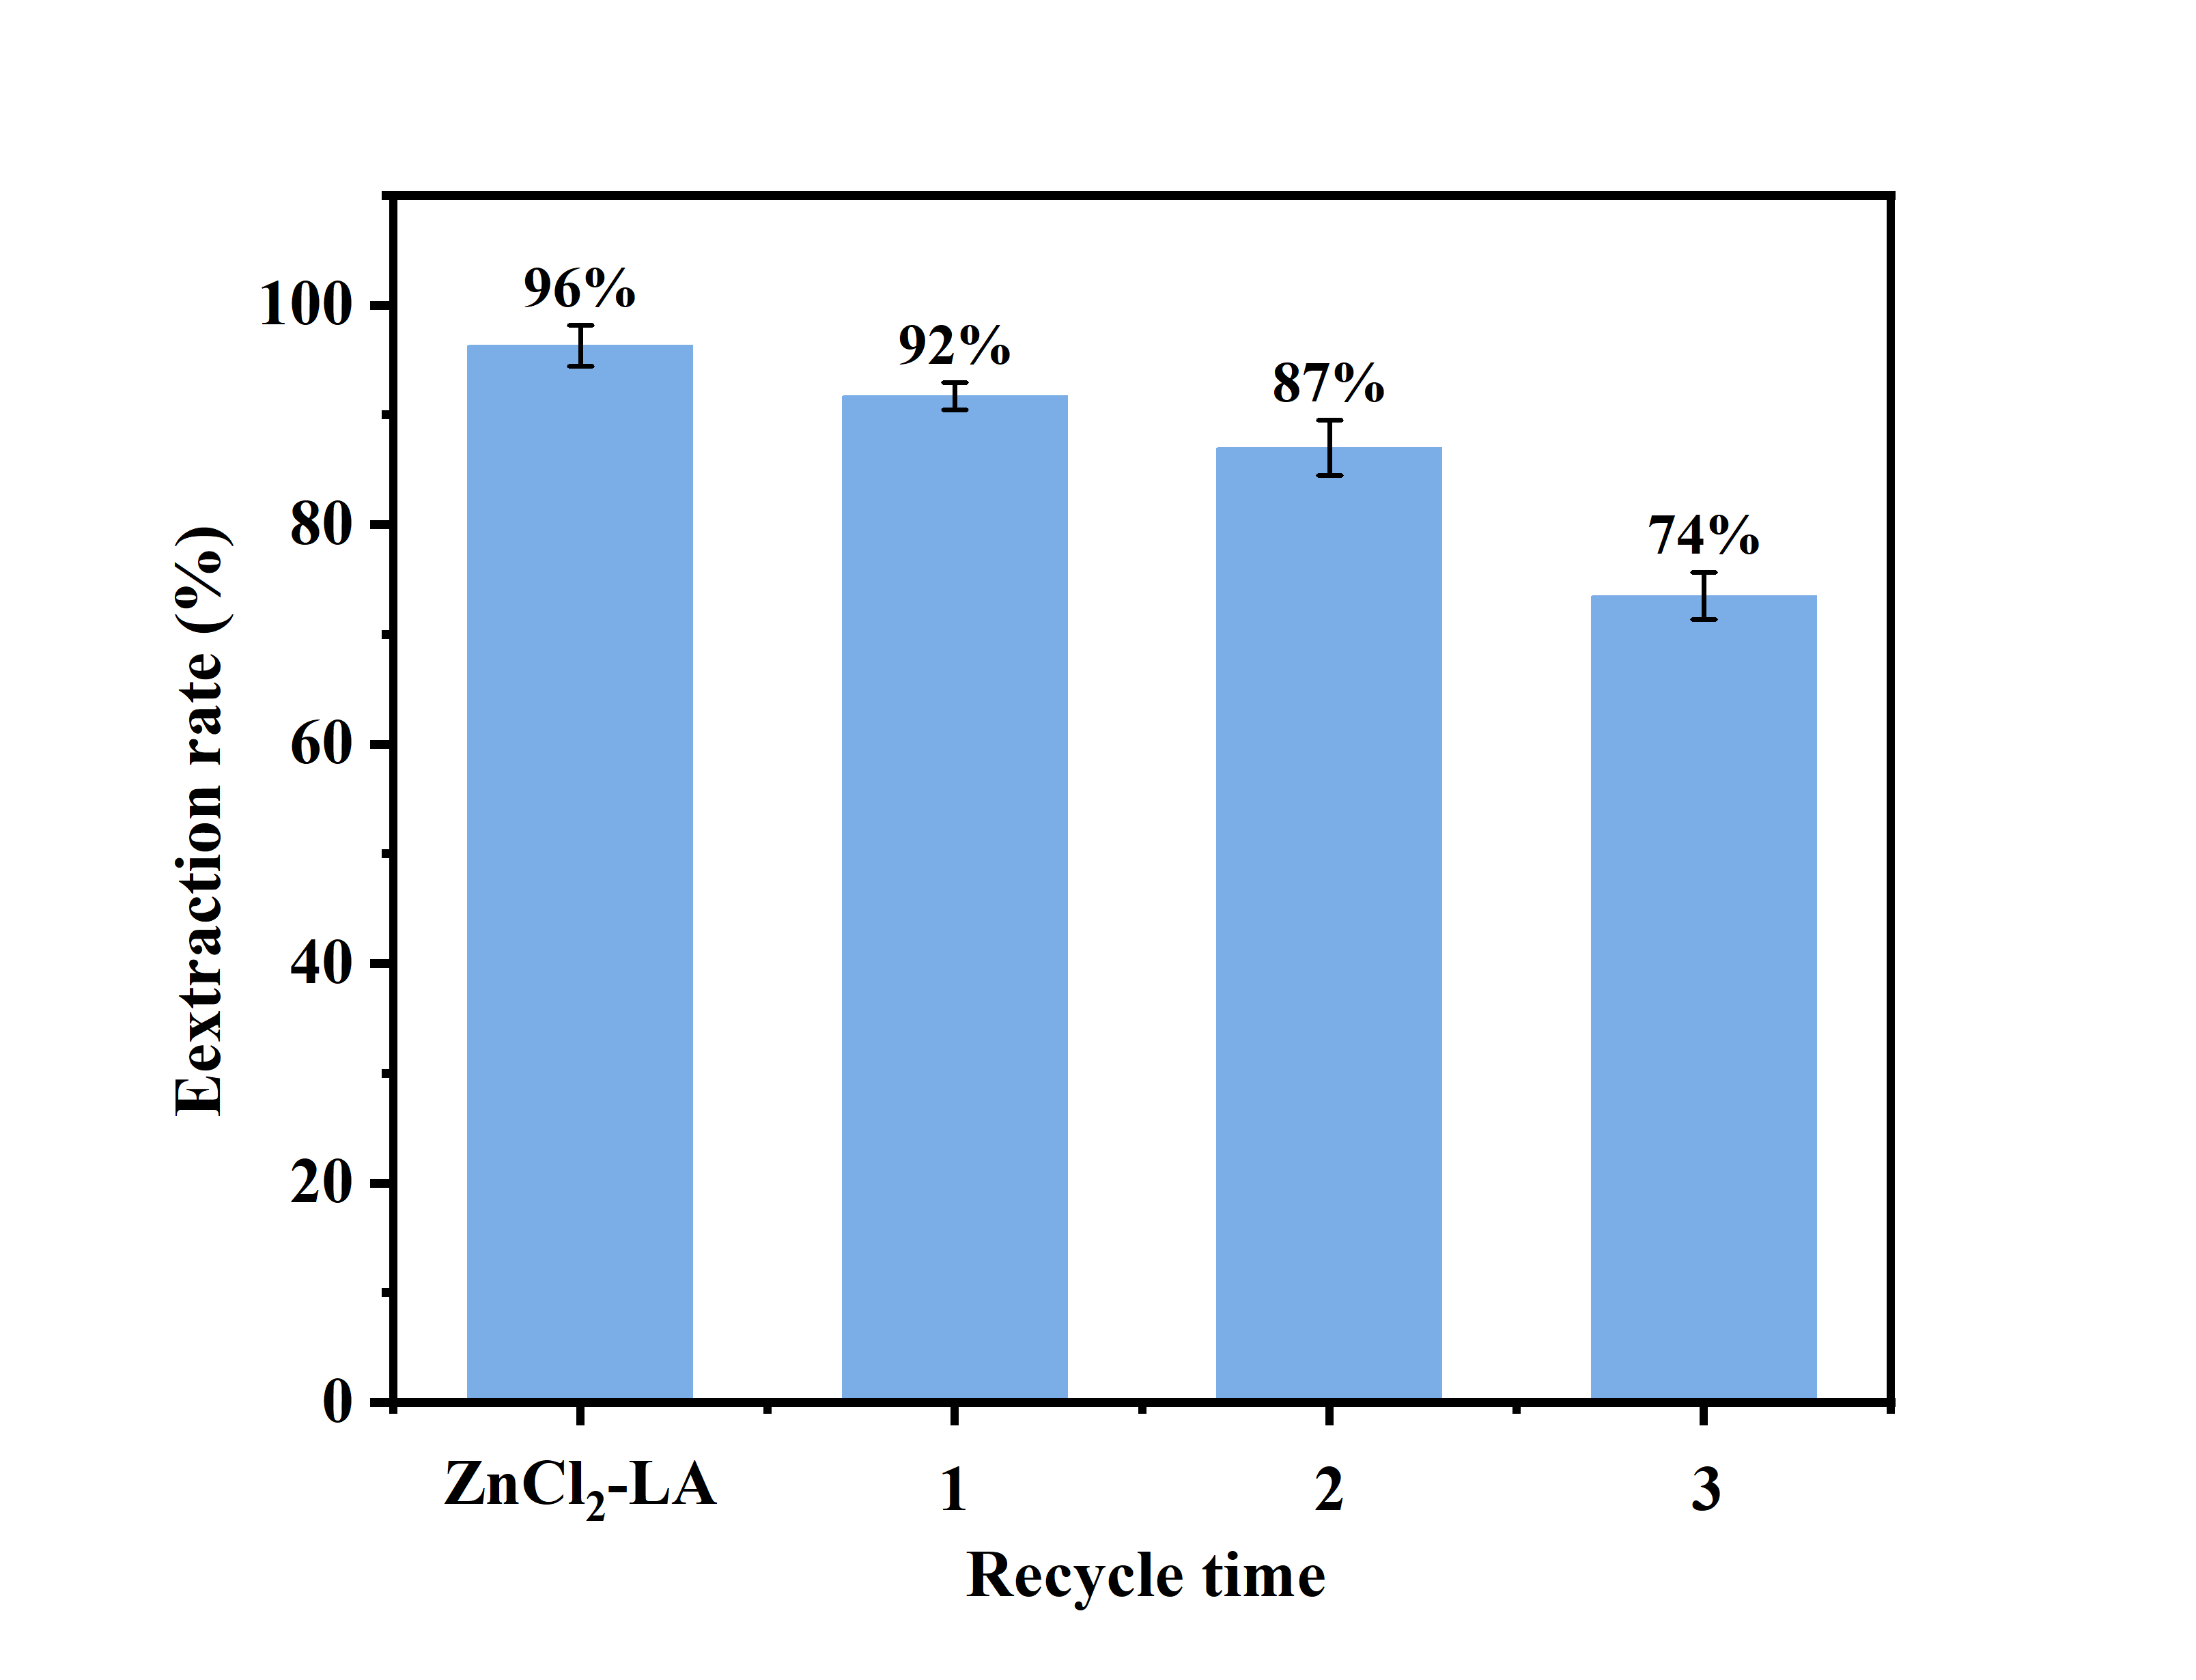


Fig. S2 Effects of DES recovery on lignin extraction. Optimal separation and extraction process conditions: DES is ZnCl2-LA (1:8, n/n), the solid-liquid ratio is 1:20, microwave time is 10 min and microwave power is 70 W.

1. **characterization of *Camellia oleifera* shell lignin**

Table S3 Assignments of FTIR bands of WCOS and MW-DESL.

| Frequency/cm-1 | Functional group |
| --- | --- |
| 3405 | O-H stretching |
| 2935 | C-H stretching |
| 1732 | C=O stretching of hemicellulose xylan |
| 1700 | C-O stretching |
| 1600 | Aromatic backbone stretching of lignin |
| 1510 | Aromatic backbone stretching of lignin |
| 1459 | Aromatic backbone stretching of lignin |
| 1367 | C-H stretching or phenolic hydroxyl group stretching in CH3 |
| 1332 | Aromatic ring with S-type structural unit |
| 1275 | C-C,C-O,C=O stretching |
| 1206 | G-type structural unit C=O expansion and contraction |
| 1113 | G-type structural unit C-H in-plane bending |
| 1030 | Bending and stretching of ether bonds on benzene ring |
| 895 | Glycosidic bond between sugar unit |
| 821 | Benzene ring C-H surface bending outward |

Table S4 Assignments of major signals in the 2D HSQC spectra of the lignin.

| Labels | δC/δH (ppm) | Assignments |
| --- | --- | --- |
| Bβ | 53.8/3.06 | Cβ-Hβ in resinol substructures (B) |
| OCH3 | 56.2/3.73 | C-H in methoxyls |
| Aγ | 58.6-61.4/3.17-3.88 | Cγ-Hγ in β-O-4 substructures (A) |
| Cγ | 63.0/3.66 | Cγ-Hγ in phenylcoumaran substructures (C) |
| A'γ | 63.7/4.36 | Cγ-Hγ in γ-acylated β-O-4 substructures (A') |
| Aα | 70.1/4.95 | Cα-Hα in β-O-4 substructures linked to a S unit (A) |
| Bγ | 71.3/4.54 | Cγ-Hγ in resinol substructures (B) |
| Bα | 84.9/4.69 | Cα-Hα in resinol substructures (B) |
| Cα | 86.8/5.49 | Cα-Hα in phenylcoumaran substructures (C) |
| S2,6 | 104.1/6.72 | C2,6-H2,6 in etherified syringyl units (S) |
| S'2,6 | 106.7/7.24 | C2,6-H2,6 in oxidized (Cα=O) phenolic syringyl units (S') |
| G2 | 111.1/6.98 | C2-H2 in guaiacyl units (G) |
| G5 | 114.4/6.74 | C5-H5 in guaiacyl units (G) |
| G6 | 118.8/6.82 | C6-H6 in guaiacyl units (G) |

Table S5 Relative molecular weight and polydispersity index of lignin.

| Sample | Mw (g/mol) | Mn (g/mol) | PDI |
| --- | --- | --- | --- |
| MW-DESL | 1597 | 1070 | 1.49 |
| EL1 | 3007 | 1249 | 2.41 |


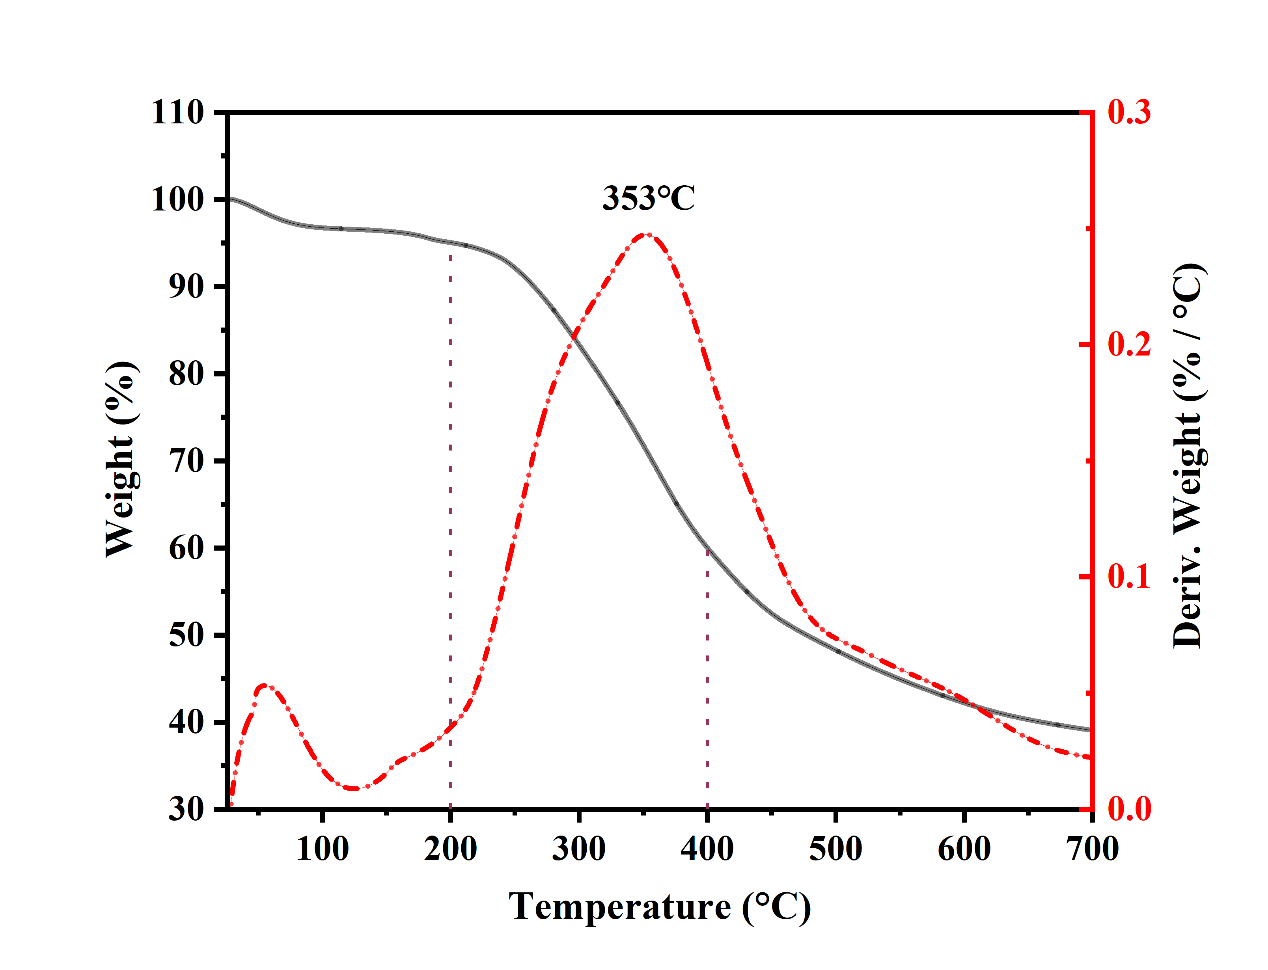


Fig. S3 MW-DESL thermogravimetric and differential thermogravimetric plot.

1. **Characterization of ZnCl2-LA/GG system**

Ji *et al.* have demonstrated through density functional theory (DFT) calculations that C-H⋯π and O⋯H interactions significantly contribute to the solubility of lignin in DES.2 Based on this findings, we conducted a detailed analysis of the ZnCl2-LA/GG system using FT-IR spectroscopy and 1H NMR spectroscopy. As depicted in Fig. S4, the FT-IR spectrum of the ZnCl2-LA/GG system closely resembles that of ZnCl2-LA, a similarity attributable to the presence of shared functional groups in both the DES and lignin as well as the high content of DES within the system. This observation aligns with the findings of Hladnik *et al*.3 Upon dissolution of GG, notable shifts in the FTIR absorption bands were observed. The O-H stretching vibration of ZnCl2-LA exhibited a redshift from 3460 cm-1 to 3443 cm-1, and the C=O stretching vibration shifted from 1732 cm-1 to 1719 cm-1. These spectral changes indicate the formation of new hydrogen bonds between the carbonyl and hydroxyl groups in ZnCl2-LA and GG, which is consistent with the DFT computational results.

Fig. S4 FTIR spectra of ZnCl2-LA and ZnCl2-LA/GG.

The proton nuclear magnetic resonance (1H NMR) spectra of ZnCl2-LA/GG, GG alone, and ZnCl2-LA are presented in Fig. S5. Notably, the chemical shifts of specific hydrogen atoms in ZnCl2-LA exhibit a shift from higher to lower magnetic field strength, suggesting the formation of robust hydrogen bonding interactions between ZnCl2-LA with GG at various interaction sites. This indicates a multifaceted and simultaneous engagement of ZnCl2-LA with GG, leading to a strong intermolecular complexation. Similarly, the chemical shifts of certain hydrogen atoms in GG also show a movement towards lower field strength, while the signals from some hydrogen atoms are no longer detectable. These changes imply that ZnCl2-LA and GG engage in extensive hydrogen bondings, resulting in a combined effect that enhances the extraction efficiency of lignin from *Camellia oleifera* shells. This observation aligns with the outcomes of the DFT calculations, reinforcing the molecular-level understanding of the solvation extraction mechanisms at play.


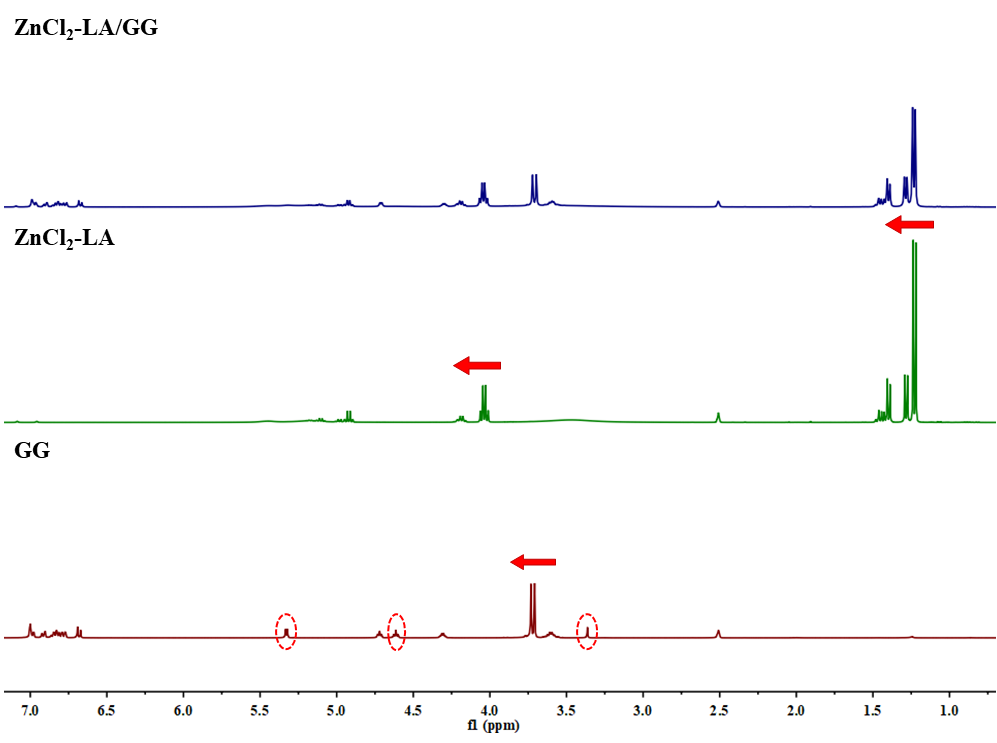


Fig. S5 1H NMR spectra of ZnCl2-LA/GG, GG and ZnCl2-LA.

1. **DFT Calculation**


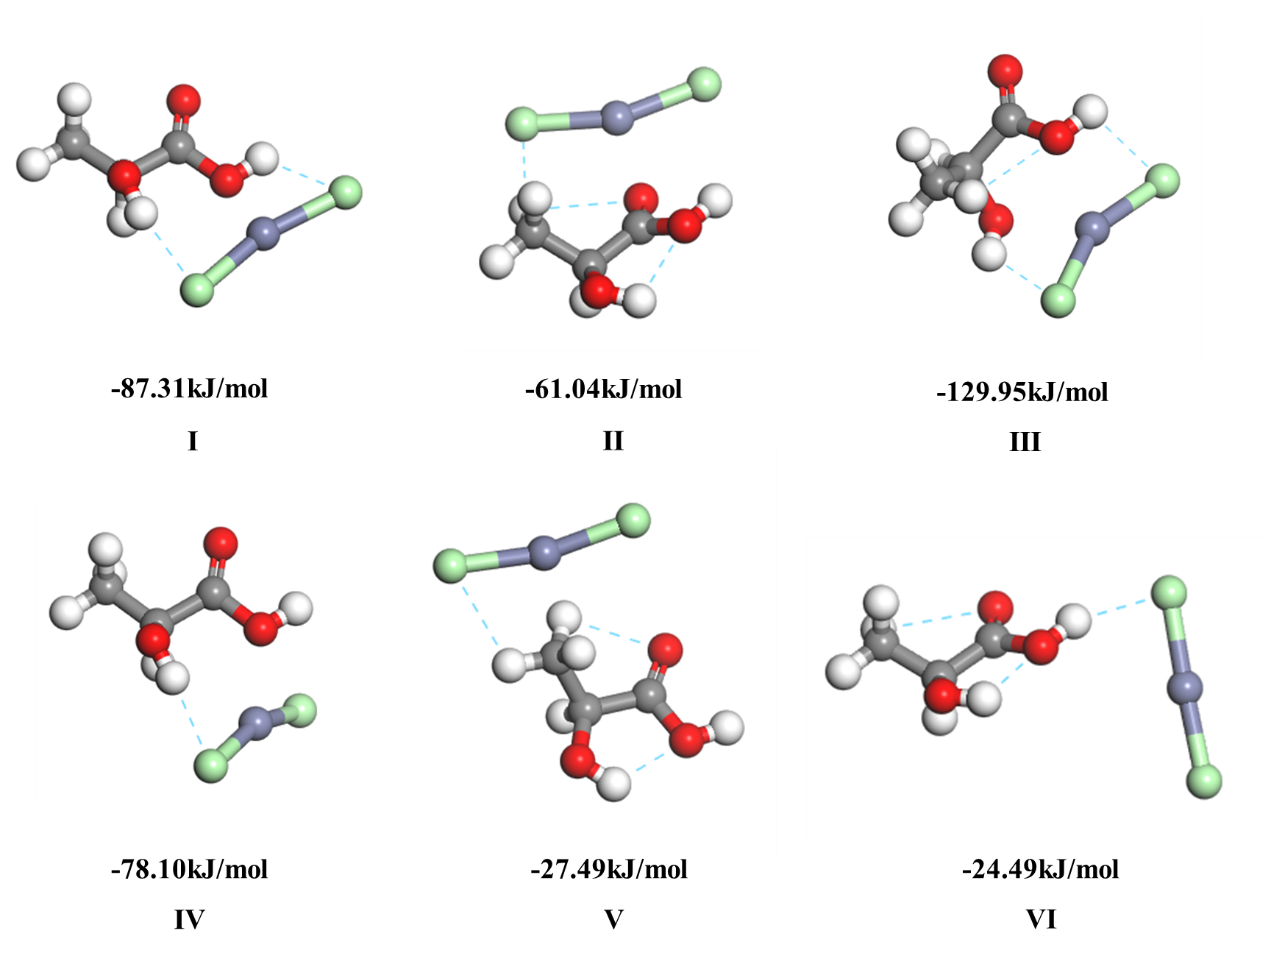


Fig. S6 Optimized interaction structures of ZnCl2-LA and the relative energies of the structures.


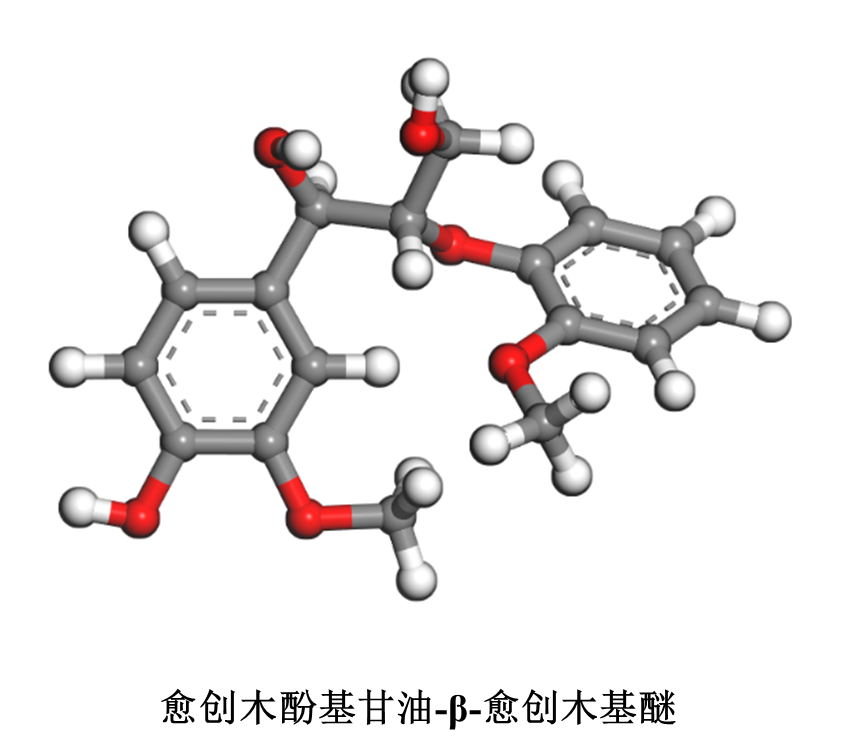


Fig. S7 Structure of GG optimized by DFT-m-GGA/M06-L.

**
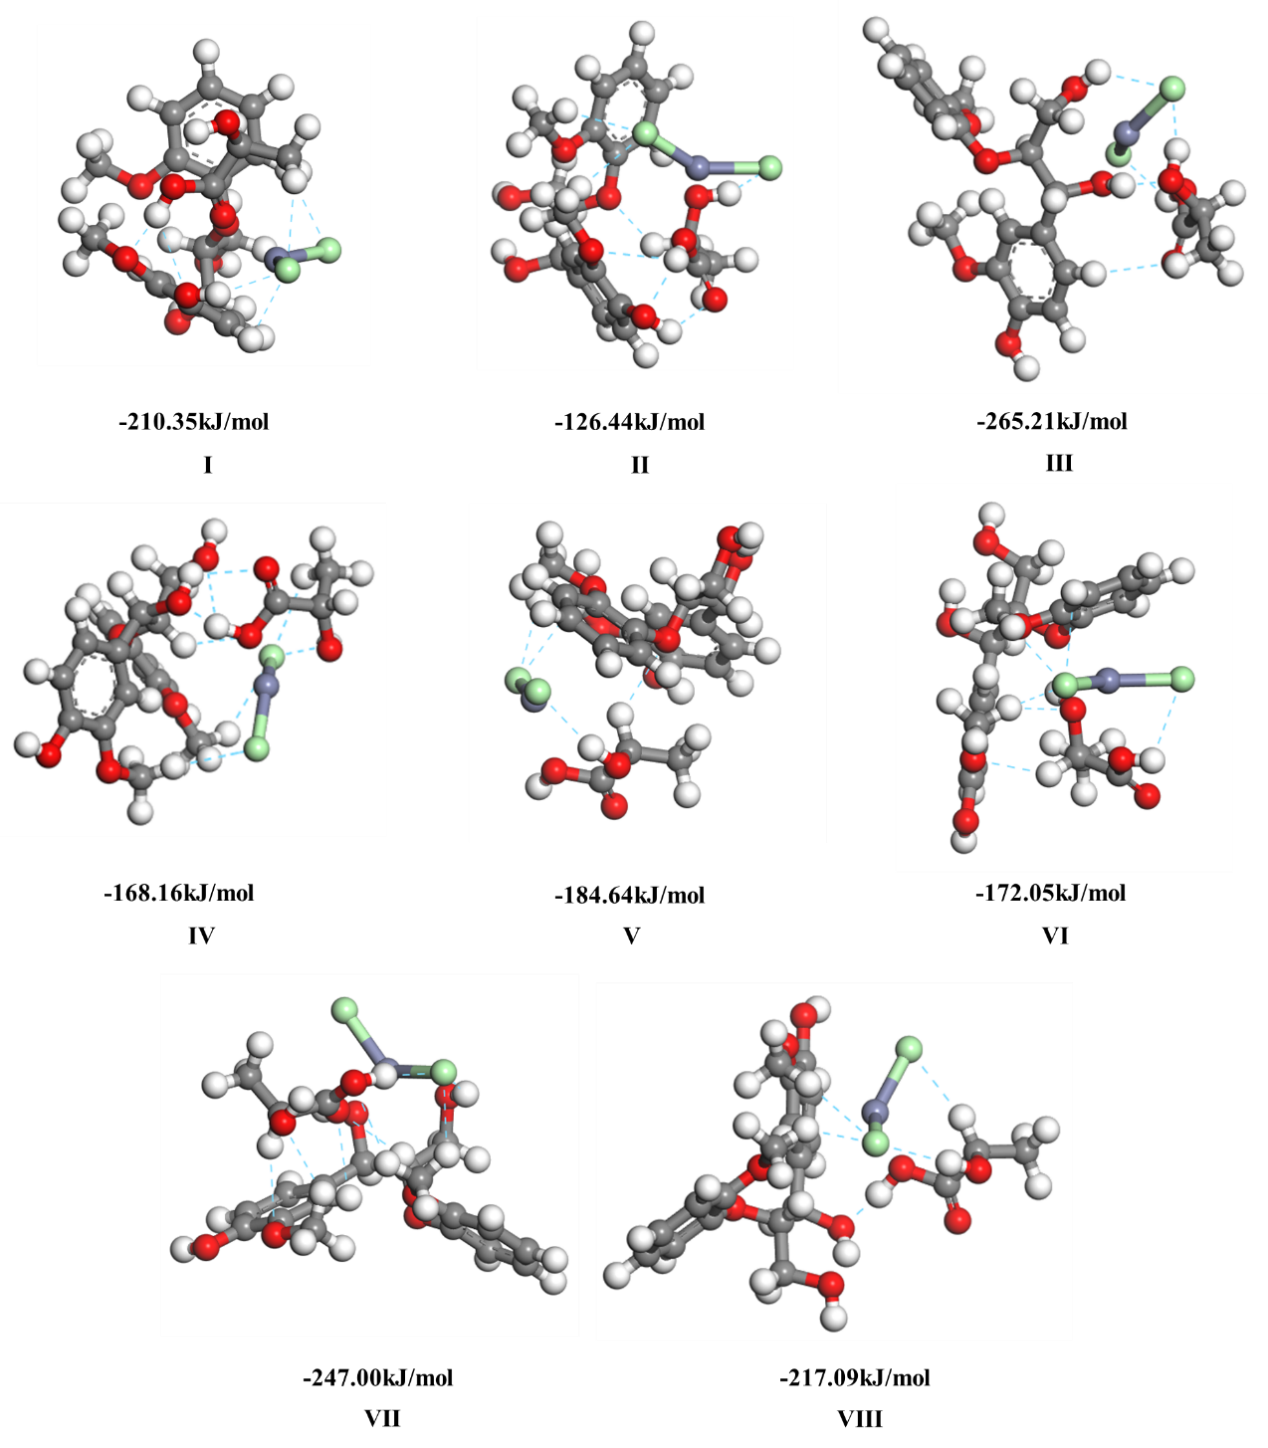
**

Fig. S8 Optimized interaction structures of ZnCl2-LA and GG and their relative energies.

1. **Analysis of solid residues and water-soluble products**


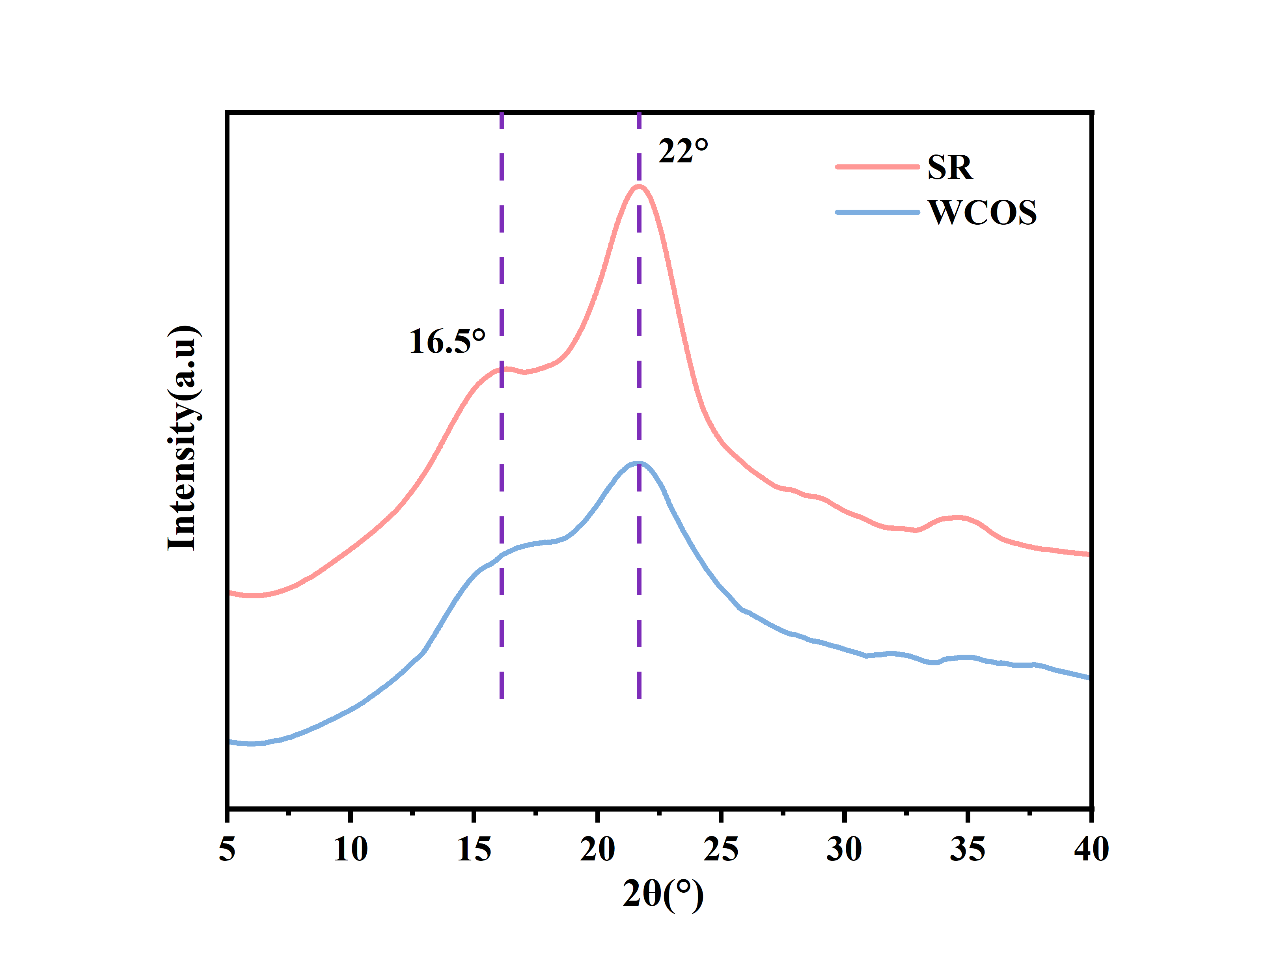


Fig. S9 X-ray diffraction patterns of WCOS and SR.

Water-soluble products were analyzed by high-performance liquid chromatography (HPLC). Detection conditions: Welch Ultimate XB-C18 column (30 cm×4.6 mm×250 mm), column temperature 25°C, detection wavelength 280 nm, injection volume 10 μL, mobile phase flow rate 1.0 mL/min, mobile phase (water phase: Acetonitrile phase=70%:30%), isocratic elution.


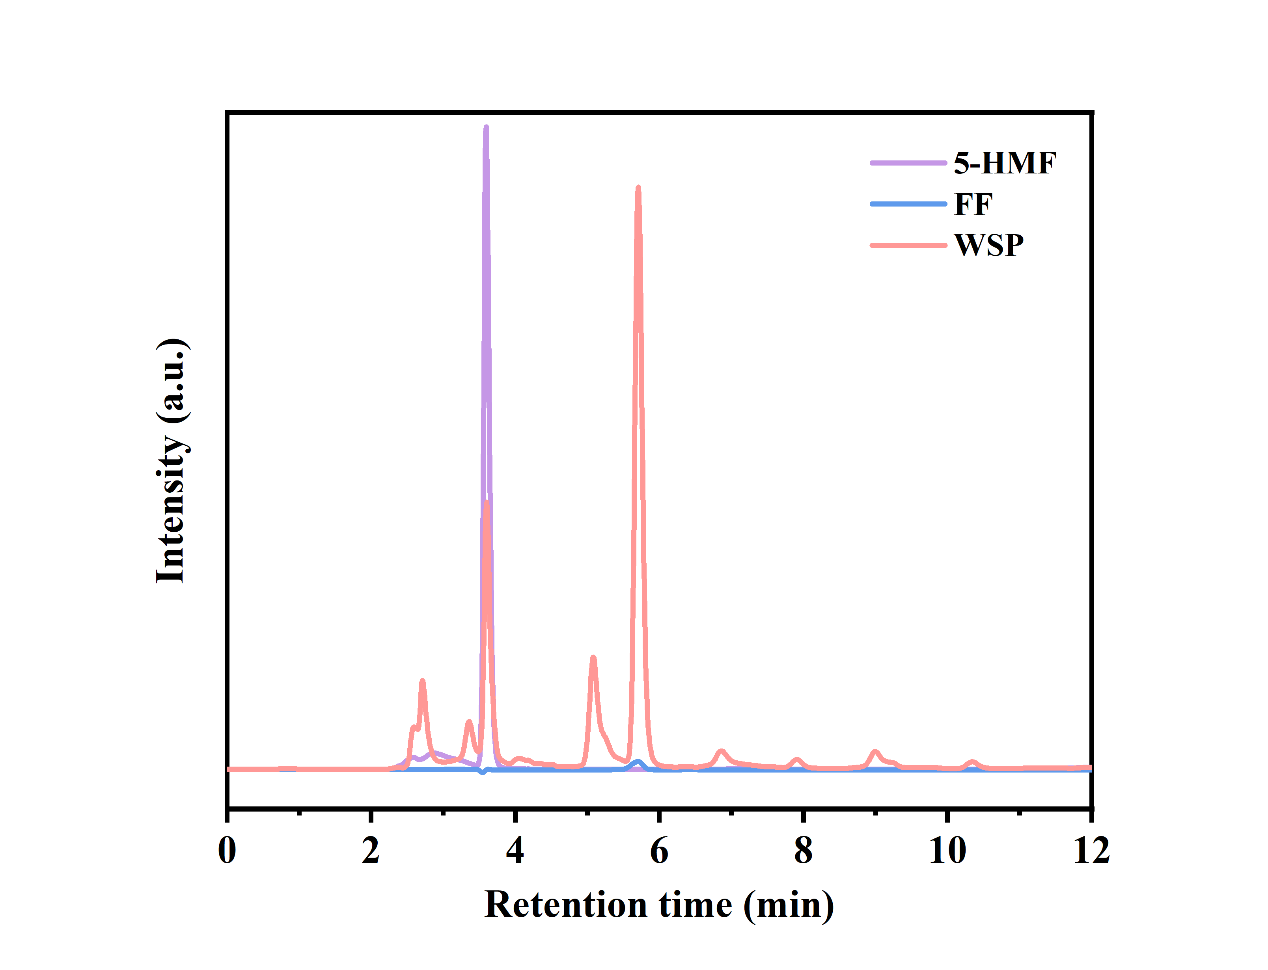


Fig. S10 HPLC chromatograms of WSP, FF and 5-HMF.

**References**

1 C. Ku, K. Li, H. Guo, Q. Wu and L. Yan, *Applied Surface Science*, 2022, **592**, 153266.

2 H. Ji and P. Lv, *Green Chem.*, 2020, **22**, 1378–1387.

3 L. Hladnik, F. A. Vicente, U. Novak, M. Grilc and B. Likozar, *Industrial Crops and Products*, 2021, **164**, 113359.
